# Supplementary material for: Understanding cardiac events in breast cancer (UCARE): pilot cardio-oncology assessment and surveillance pathway for breast cancer patients
Source: PubMed Central journal article supplement (PMC11297098; doi:10.1007/s10549-024-07322-w), 2024-06-26

Advanced Therapies and Cancer Cluster  
HRB Clinical Research Facility, Galway  
*Áis Taighde Chliniciúil HRB, Gaillimh*

**GP letter**

Galway University  
Hospital & National  
University of Ireland  
Galway

Date:

---

**Subject: UCARE Study**

Understanding **CARDiac** Events in Breast Cancer .A Pilot Cardio-Oncology Assessment and Surveillance Pathway for Breast Cancer Patients.

Dear .....

I am contacting you today to inform you that ..... is taking part in a research study being conducted at Galway, Mayo and Sligo University Hospitals. She has consented to you being informed.

The Irish Cancer Society and Cardio Oncology Research Group Prof William Wyns jointly fund this project.

The study endpoint is the Establishment of a Cardio-Oncology assessment and surveillance pathway for breast cancer patients undergoing adjuvant systemic chemotherapy at either Galway, Mayo or Sligo University Hospital and the assessment of the feasibility of trialling this approach for risk assessment and early detection of Cancer Treatment Related Cardiac Dysfunction (CTRCD )

Our objective is to

1. To evaluate the baseline cardiovascular health (CVH) of patients undergoing multimodal treatment for breast cancer, including systemic chemotherapy
2. To identify host and treatment related risk factors for the development of acute CTRCD in a cohort of Irish patients undergoing multimodal treatment for breast cancer
3. To describe the incidence of acute CTRCD in a cohort of Irish patients undergoing multimodal treatment for breast cancer, including systemic chemotherapy.
4. To elucidate the role of specific imaging, clinical and laboratory markers in the prediction and early detection of CTRCD in patients undergoing multimodal treatment for breast cancer

Breast Cancer patients scheduled for chemotherapy routinely have baseline Cardiac Echo and ECG before chemotherapy. In this study, we will formalise the risk assessment of patients scheduled for breast cancer treatment. Patients with higher risk will have closer monitoring by a cardiologist with more frequent cardiac echos and ECG and we will also take some blood for cardiac biomarkers

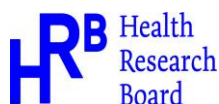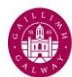

OLLSCOIL NA GAILLIMHE  
UNIVERSITY OF GALWAY

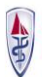

Galway University Hospitals  
*Ospidéal na h-Ollscoile Gaillimh*  
UNIVERSITY HOSPITAL GALWAY  
MERLIN PARK UNIVERSITY HOSPITAL

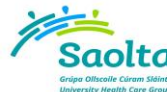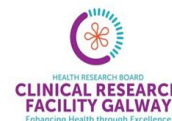

Advanced Therapies and Cancer Cluster  
HRB Clinical Research Facility, Galway  
*Áis Taighde Chliniciúil HRB, Gaillimh*

To gain a better insight into the breast cancer patients cardiac performance status post chemotherapy, we will follow up the patients for 12 months after treatment. Ultimately, we want to determine if closer monitoring will lead us to creating an improved patient pathway.

We aim to enrol 100 patients onto this study

Please feel free to contact me if you require further information.

Kind regards

---

Professor Aoife Lowery  
National University of Ireland Galway.

E. [aoife.lowery@nuigalway.ie](mailto:aoife.lowery@nuigalway.ie)

Advanced Therapies and Cancer Cluster  
HRB Clinical Research Facility, Galway  
*Áis Taighde Chliniciúil HRB, Gaillimh*

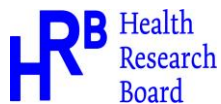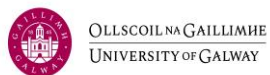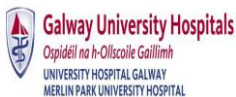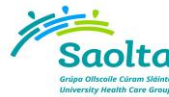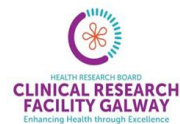

Supplement: 10549_2024_7322_MOESM3_ESM.pdf [file 10549_2024_7322_MOESM3_ESM.pdf]
