# Supplementary material for: Understanding cardiac events in breast cancer (UCARE): pilot cardio-oncology assessment and surveillance pathway for breast cancer patients
Source: PubMed Central journal article supplement (PMC11297098; doi:10.1007/s10549-024-07322-w), 2024-06-26
Supplement: 10549_2024_7322_MOESM2_ESM.pdf [file 10549_2024_7322_MOESM2_ESM.pdf]

**Table 1 Anthracycline chemotherapy - Low and Moderate Risk**

| <b>Timeline</b>                                                                                                                         | Baseline | C1D1 | C2D1 | C3D1 | 3M | C4D1 | C5D1 | 6M | C6D1 | 9M | 12M/3 M<br>post<br>treatment | 24M/12M<br>post<br>treatment |
|-----------------------------------------------------------------------------------------------------------------------------------------|----------|------|------|------|----|------|------|----|------|----|------------------------------|------------------------------|
| <b>Procedures</b>                                                                                                                       |          |      |      |      |    |      |      |    |      |    |                              |                              |
| <b>Screening/Eligibility</b>                                                                                                            |          |      |      |      |    |      |      |    |      |    |                              |                              |
| Informed Consent                                                                                                                        | X        |      |      |      |    |      |      |    |      |    |                              |                              |
| Screening/Eligibility                                                                                                                   | x        |      |      |      |    |      |      |    |      |    |                              |                              |
| Enrolment form                                                                                                                          | x        |      |      |      |    |      |      |    |      |    |                              |                              |
| <b>1. Medical History</b><br><b>2. HFA-ICOS Risk Assessment</b><br><b>3. Baseline Cancer Details</b><br><b>4. Oncological Treatment</b> | X        |      |      |      |    |      |      |    |      |    |                              |                              |
| <b>Demographics</b>                                                                                                                     |          |      |      |      |    |      |      |    |      |    |                              |                              |
| Vital signs and BMI                                                                                                                     | x        |      | x    |      |    | x    |      | x  |      | x  |                              |                              |
| <b>Medications (CV &amp; Other)</b>                                                                                                     |          |      |      |      |    |      |      |    |      |    |                              |                              |
| CV Medications                                                                                                                          | x        |      | x    |      |    | x    |      | x  |      | x  |                              |                              |
| Concomitant Medications                                                                                                                 | x        |      | x    |      |    | x    |      | x  |      | x  |                              |                              |
| <b>Cardiac Biomarkers (cTn/NP)</b>                                                                                                      | x        |      | x    |      |    | x    |      |    | x    |    | x                            |                              |
| <b>Lipid Profile</b>                                                                                                                    | x        |      | x    |      |    | x    |      |    | x    |    | x                            | x                            |
| <b>Urea &amp; Electrolytes</b>                                                                                                          | x        |      | x    |      |    | x    |      |    | x    |    | x                            | x                            |
| <b>Biobank</b>                                                                                                                          |          |      |      |      |    |      |      |    |      |    |                              |                              |
| Bloods for Biobank                                                                                                                      | x        |      | x    |      |    | x    |      |    | x    | x  | x                            | x                            |
| <b>Baseline Measurements/Follow-Up Measurements</b>                                                                                     |          |      |      |      |    |      |      |    |      |    |                              |                              |
| ECG                                                                                                                                     | x        |      |      |      |    |      |      |    |      |    |                              |                              |
| TTE +/- Stress Echocardiography                                                                                                         | x        |      |      |      |    | x    |      |    |      |    |                              | x                            |
| Cardiac MRI**                                                                                                                           | x        |      |      |      |    | x    |      |    |      |    |                              | x                            |
| CT scan of the chest (Cardiac, breast)****                                                                                              | x        |      |      |      |    |      |      |    |      |    |                              |                              |
| <b>Cardiac Toxicity &amp; Cancer Related Events</b>                                                                                     |          |      |      |      |    |      |      |    |      |    |                              |                              |
| Cardiac Event Form and Phone Interview                                                                                                  |          |      |      |      | x  |      |      | x  |      | x  | x                            | x                            |
| ePRO Quality of Life Surveys ***( <b>QLQ-30; QLQ-BR45; EQ-5D-5L; Perceived Stress Scale; Self-Evaluation</b> )                          | x        |      |      |      | x  |      |      | x  |      | x  | x                            | x                            |

\*saliva only collected in high risk patients who will be wearing smart sensors

\*\*Cardiac MRI only in subset of patients if required based on Echocardiography findings/Cardiology opinion

\*\*\*surveys include EORTC QLQ-C30, EORTC QLQ BR 45, EQ-5D-5L, Perceived Stress Scale PSS-10, State Trait Anxiety Inventory (STAI)

\*\*\*\* Will be done if oncologically indicated and assessed by cardiology team for calcification index

**Table 2 Anthracycline based chemotherapy – High and Very High Risk**

| Timeline                                                                                              | Baseline | C1D1 | C2D1 | 3M | C3D1 | C4D1 | C5D1 | 6M | C6D1 | 9M | 12M/3 M post treatment | 24M/12M post treatment |
|-------------------------------------------------------------------------------------------------------|----------|------|------|----|------|------|------|----|------|----|------------------------|------------------------|
| <b>Screening/Eligibility</b>                                                                          |          |      |      |    |      |      |      |    |      |    |                        |                        |
| Informed Consent                                                                                      | X        |      |      |    |      |      |      |    |      |    |                        |                        |
| Screening/Eligibility                                                                                 | x        |      |      |    |      |      |      |    |      |    |                        |                        |
| Enrolment form                                                                                        | x        |      |      |    |      |      |      |    |      |    |                        |                        |
| 1. Medical History<br>2. HFA-ICOS Risk Assessment<br>3. Baseline Cancer Details<br>4. Oncological T   | X        |      |      |    |      |      |      |    |      |    |                        |                        |
| <b>Demographics</b>                                                                                   |          |      |      |    |      |      |      |    |      |    |                        |                        |
| Weight , BP and BMI                                                                                   | x        |      | x    |    |      | x    |      | x  |      | x  |                        |                        |
| <b>Medications (CV &amp; Other)</b>                                                                   |          |      |      |    |      |      |      |    |      |    |                        |                        |
| CV Medication Review                                                                                  | x        |      | x    |    |      | x    |      | x  |      | x  |                        |                        |
| Concomitant Medications                                                                               | x        |      | x    |    |      | x    |      | x  |      | x  |                        |                        |
| Cardiac Biomarkers (cTn/NP)                                                                           | x        | x    | x    |    | x    | x    | x    |    | x    |    | x                      | x                      |
| Lipid Profile                                                                                         | x        |      | x    |    |      | x    |      |    | x    |    | x                      | x                      |
| Urea & Electrolytes                                                                                   | x        |      | x    |    |      | x    |      |    | x    |    | x                      | x                      |
| <b>Biobank</b>                                                                                        |          |      |      |    |      |      |      |    |      |    |                        |                        |
| Bloods for Biobank                                                                                    | x        |      | x    |    | x    | x    |      |    | x    | x  | x                      | x                      |
| saliva* for Biobank                                                                                   | x        |      | x    |    | x    | x    |      |    | x    | x  | x                      |                        |
| <b>Baseline Measurements/Follow-Up Measurements</b>                                                   |          |      |      |    |      |      |      |    |      |    |                        |                        |
| ECG                                                                                                   | x        |      |      |    |      |      |      |    |      |    |                        |                        |
| TTE +/- Stress Echocardiography                                                                       | x        |      | x    |    |      | x    |      |    | x    |    | x                      | x                      |
| Cardiac MRI**                                                                                         | x        |      | x    |    |      | x    |      |    | x    |    | x                      | x                      |
| CT scan of the chest (Cardiac, breast)****                                                            | x        |      |      |    |      |      |      |    |      |    |                        |                        |
| <b>Cardiac Toxicity &amp; Cancer Related Events</b>                                                   |          |      |      |    |      |      |      |    |      |    |                        |                        |
| Cardiac Event Form and Phone Interview                                                                |          |      | x    |    |      | x    |      |    | x    | x  | x                      | x                      |
| ePRO Quality of Life Surveys ***(QLQ-30; QLQ-BR45; EQ-5D-5L; Perceived Stress Scale; Self-Evaluation) | x        |      |      | x  |      |      |      | x  |      | x  | x                      | x                      |

\*saliva only collected in high risk patients who will be wearing smart sensors

\*\*Cardiac MRI only in subset of patients if required based on Echocardiography findings/Cardiology opinion

\*\*\*surveys include EORTC QLQ-C30, EORTC QLQ BR 45, EQ-5D-5L, Perceived Stress Scale PSS-10, State Trait Anxiety Inventory (STAI)

\*\*\*\* Will be done if oncologically indicated and assessed by cardiology team for calcification index

**Table 3 Her2 Targeted Therapy –Low and Moderate Risk**

| <b>Timeline</b>                                                                                                                         | Baseline | 3M | 6M | 9M | 12M | 24M/12M post treatment |
|-----------------------------------------------------------------------------------------------------------------------------------------|----------|----|----|----|-----|------------------------|
| <b>Screening/Eligibility</b>                                                                                                            |          |    |    |    |     |                        |
| Informed Consent                                                                                                                        | x        |    |    |    |     |                        |
| Screening/Eligibility                                                                                                                   | X        |    |    |    |     |                        |
| Enrolment form                                                                                                                          | x        |    |    |    |     |                        |
| <b>1. Medical History</b><br><b>2. HFA-ICOS Risk Assessment</b><br><b>3. Baseline Cancer Details</b><br><b>4. Oncological Treatment</b> | X        |    |    |    |     |                        |
| <b>Demographics</b>                                                                                                                     |          |    |    |    |     |                        |
| Weight BP and BMI                                                                                                                       | x        | x  | x  | x  | x   | x                      |
| <b>Medications (CV &amp; Other)</b>                                                                                                     |          |    |    |    |     |                        |
| CV Medication Review                                                                                                                    | x        | x  | x  | x  | x   | x                      |
| Other Medications                                                                                                                       | x        | x  | x  | x  | x   | x                      |
| <b>Cardiac Biomarkers (cTn/NP)</b>                                                                                                      | x        | x  | x  | x  | x   | x                      |
| <b>Lipid Profile</b>                                                                                                                    | x        | x  | x  | x  | x   | x                      |
| <b>Urea &amp; Electrolytes</b>                                                                                                          | x        | x  | x  | x  | x   | x                      |
| <b>Biobank</b>                                                                                                                          |          |    |    |    |     |                        |
| Bloods for Biobank                                                                                                                      | x        | x  | x  | x  | x   | x                      |
| <b>Baseline Measurements/Follow-Up Measurements</b>                                                                                     |          |    |    |    |     |                        |
| TTE +/- Stress Echocardiography                                                                                                         | x        | x  | x  | x  | x   | x                      |
| Cardiac MRI**                                                                                                                           | x        | x  | x  | x  | x   | x                      |
| ECG                                                                                                                                     | x        |    |    |    |     | x                      |
| CT scan of the chest (Cardiac, breast)****                                                                                              | x        |    |    |    |     |                        |
| <b>Cardiac Toxicity &amp; Cancer Related Events</b>                                                                                     |          |    |    |    |     |                        |
| Cardiac Event Form and Phone Interview                                                                                                  |          | x  | x  | x  | x   | x                      |
| ePRO Quality of Life Surveys ***<br><b>(QLQ-30; QLQ-BR45; EQ-5D-5L; Perceived Stress Scale; Self-Evaluation)</b>                        | x        | x  | x  | x  | x   | x                      |

\*saliva only collected in high risk patients who will be wearing smart sensors

\*\*Cardiac MRI only in subset of patients if required based on Echocardiography findings/Cardiology opinion

\*\*\*surveys include EORTC QLQ-C30, EORTC QLQ BR 45, EQ-5D-5L, Perceived Stress Scale PSS-10, State Trait Anxiety Inventory (STAI)

\*\*\*\* Will be done if oncologically indicated and assessed by cardiology team for calcification index

**Table 4 Her2 Targeted Therapy – High Risk and Very High Risk**

| <b>Timeline</b>                                                                                                                         | Baseline | 3M | 6M | 9M | 12M | 15M/3M post treatment | 24M/12M post treatment |
|-----------------------------------------------------------------------------------------------------------------------------------------|----------|----|----|----|-----|-----------------------|------------------------|
| <b>Procedures</b>                                                                                                                       |          |    |    |    |     |                       |                        |
| <b>Screening/Eligibility</b>                                                                                                            |          |    |    |    |     |                       |                        |
| Informed Consent                                                                                                                        | X        |    |    |    |     |                       |                        |
| Screening/Eligibility                                                                                                                   | x        |    |    |    |     |                       |                        |
| Enrollment form                                                                                                                         | x        |    |    |    |     |                       |                        |
| <b>1. Medical History</b><br><b>2. HFA-ICOS Risk Assessment</b><br><b>3. Baseline Cancer Details</b><br><b>4. Oncological Treatment</b> | X        |    |    |    |     |                       |                        |
| <b>Demographics</b>                                                                                                                     |          |    |    |    |     |                       |                        |
| Weight BP and BMI                                                                                                                       | x        | x  | x  | x  | x   |                       | x                      |
| <b>Medications (CV &amp; Other)</b>                                                                                                     |          |    |    |    |     |                       |                        |
| CV Medication Review                                                                                                                    | x        | x  | x  | x  | x   |                       | x                      |
| Other Medications                                                                                                                       | x        | x  | x  | x  | x   |                       | x                      |
| <b>Cardiac Biomarkers (cTn/NP)</b>                                                                                                      | x        | x  | x  | x  | x   | x                     | x                      |
| <b>Lipid Profile</b>                                                                                                                    | x        | x  | x  | x  | x   | x                     | x                      |
| <b>Urea &amp; Electrolytes</b>                                                                                                          | x        | x  | x  | x  | x   | x                     | x                      |
| <b>Biobank</b>                                                                                                                          |          |    |    |    |     |                       |                        |
| Bloods for biobank                                                                                                                      | x        | x  | x  | x  | x   | x                     | x                      |
| Saliva for Biobank                                                                                                                      | x        | x  | x  | x  | x   | x                     | x                      |
| <b>Baseline Measurements/Follow-Up Measurements</b>                                                                                     |          |    |    |    |     |                       |                        |
| TTE +/- Stress Echocardiography                                                                                                         | x        | x  | x  | x  | x   | x                     | x                      |
| Cardiac MRI**                                                                                                                           | x        | x  | x  | x  | x   | x                     | x                      |
| ECG                                                                                                                                     | x        |    |    |    |     |                       |                        |
| CT scan of the chest (Cardiac, breast)****                                                                                              | x        |    |    |    |     |                       |                        |
| <b>Cardiac Toxicity &amp; Cancer Related Events</b>                                                                                     |          |    |    |    |     |                       |                        |
| Cardiac Event Form and Phone Interview                                                                                                  |          | x  | x  | x  | x   |                       | x                      |
| <b>ePRO Quality of Life Surveys *** (QLQ-30; QLQ-BR45; EQ-5D-5L; Perceived Stress Scale; Self-Evaluation)</b>                           | x        | x  | x  | x  | x   |                       | x                      |

\*saliva only collected in high risk patients who will be wearing smart sensors

\*\*Cardiac MRI only in subset of patients if required based on Echocardiography findings/Cardiology opinion

\*\*\*surveys include EORTC QLQ-C30, EORTC QLQ BR 45, EQ-5D-5L, Perceived Stress Scale PSS-10, State Trait Anxiety Inventory (STAI)

\*\*\*\* Will be done if oncologically indicated and assessed by cardiology team for calcification index
