# Supplementary material for: Understanding cardiac events in breast cancer (UCARE): pilot cardio-oncology assessment and surveillance pathway for breast cancer patients
Source: PubMed Central journal article supplement (PMC11297098; doi:10.1007/s10549-024-07322-w), 2024-06-26
Supplement: 10549_2024_7322_MOESM5_ESM.pdf [file 10549_2024_7322_MOESM5_ESM.pdf]

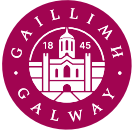

**Study Title: UCARE - Understanding CARdiac Events in Breast Cancer .A Pilot Cardio-Oncology Assessment and Surveillance Pathway for Breast Cancer Patients as an Intervention For The Early Detection of Cancer Treatment Related Cardiac Dysfunction(CTRCD)**

**Patient Details:** *insert patient details here*

Dear *(Insert medical oncologist details here)*

Your patient *(name & board number)* has been enrolled on the UCARE study and as part of this study has had a Heart Failure Association – International Cardio-Oncology Society (HFA-ICOS) risk assessment performed.

This letter is to inform you that the HFA-ICOS risk assessment has indicated that this patient is at MODERATE RISK of developing CTRCD as a result of their planned treatment with *(insert chemotherapy/Herceptin details here)*.

As part of the UCARE study they have been allocated to a moderate risk surveillance pathway in line with European Society of Cardiology Guidelines

<https://academic.oup.com/eurheartj/article/43/41/4229/6673995>

Please do not hesitate to contact us if any further information is required.

Kind Regards

UCARE Investigators

Prof Aoife Lowery

Prof Osama Soliman



OLLSCOIL NA GAILLIMHE  
UNIVERSITY OF GALWAY

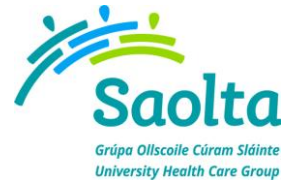

Ollscoil na Gaillimhe, University of Galway,  
Bóthar na hOllscoile, University Road,  
Gaillimh, H91 TK33, Galway, H91 TK33,  
Éire Ireland
